# Supplementary material for: Physiological and Metabolic Responses of Rice to Reduced Soil Moisture: Relationship of Water Stress Tolerance and Grain Production
Source: PubMed Central journal article supplement (PMC6514846; doi:10.3390/ijms20081846), 2019-04-15
Supplement: ijms-20-01846-s001.pdf [file ijms-20-01846-s001.pdf]

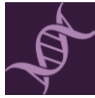

**Jinyoung Y. Barnaby**<sup>1</sup>, **Jai S. Rohila**<sup>1</sup>, **Chris G. Henry**<sup>2</sup>, **Richard C. Sicher**<sup>3</sup>, **Vagimalla R. Reddy**<sup>3</sup> and **Anna M. McClung**<sup>1,\*</sup>

<sup>1</sup> USDA-ARS Dale Bumpers National Rice Research Center, Stuttgart, AR 72160, USA; jinyoung.barnaby@ars.usda.gov (J.Y.B.); jai.rohila@ars.usda.gov (J.S.R.)

<sup>2</sup> Department of Biological and Agricultural Engineering, University of Arkansas, Fayetteville, AR 72701, USA; cghenry@uark.edu

<sup>3</sup> USDA-ARS Adaptive Cropping Systems Laboratory, Henry A. Wallace Beltsville Agricultural Research Center, Beltsville, MD 20705, USA; rsicher1981@gmail.com (R.C.S.); vangimalla.reddy@ars.usda.gov (V.R.R.)

\* Correspondence: Anna.Mcclung@ars.usda.gov; Tel.: +1-870-672-9300; Fax: +1-870-673-7581

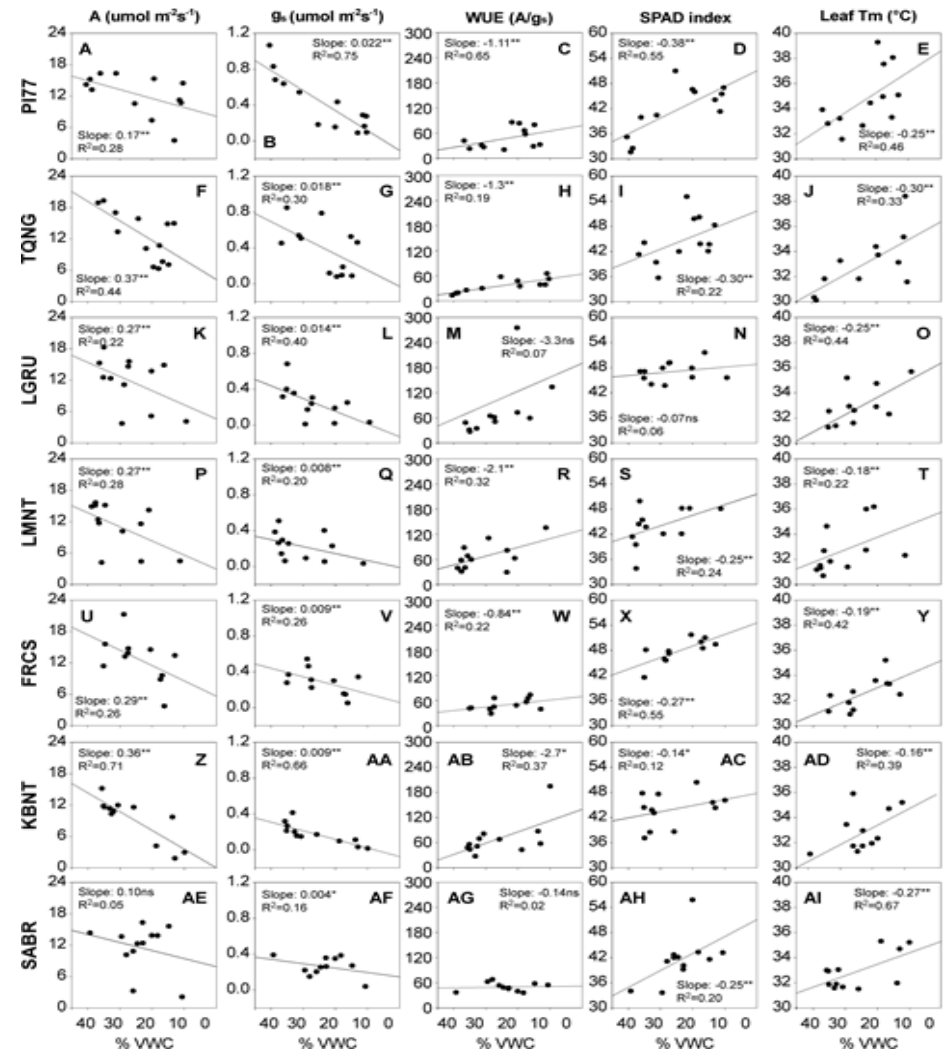

**Figure S1.** Physiological responses to different levels of irrigation as measured by volumetric water content (horizontal axis) of seven cultivars. The y-axis shows values of A,  $g_s$ , WUE ( $A/g_s$ ), SPAD index, and leaf  $T_m$ . Other details are as in Figure 1.

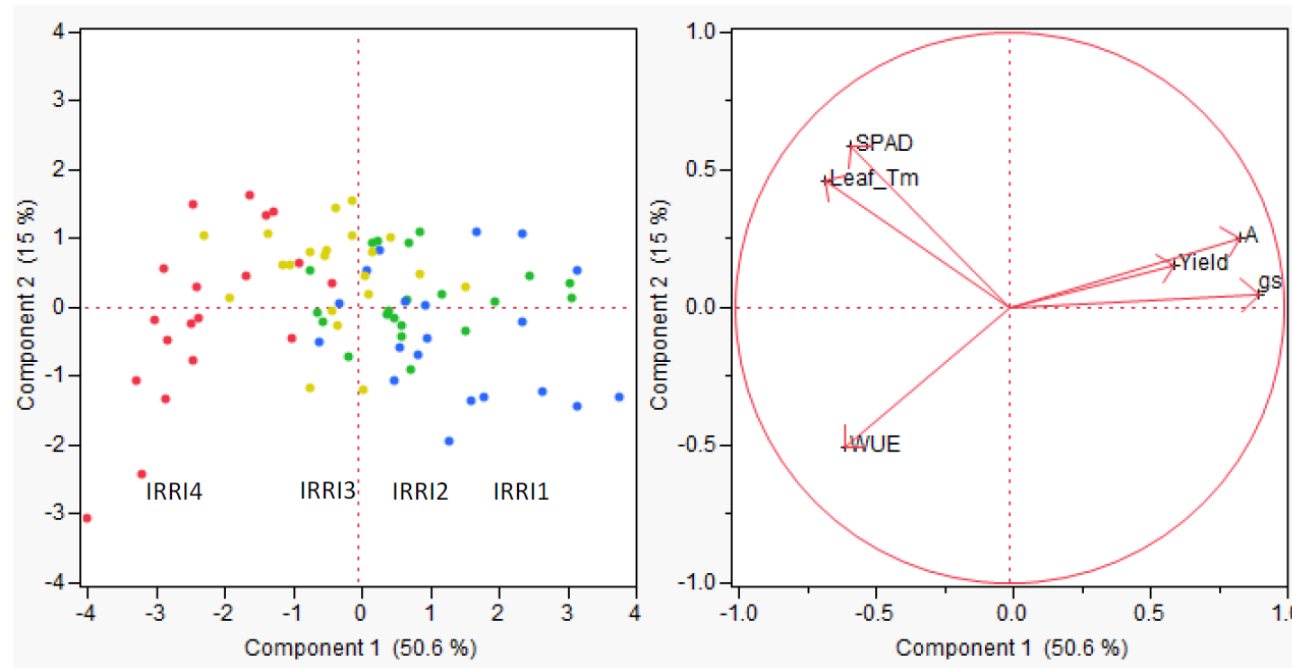

**Figure S2.** Principal component analysis of physiological parameters,  $A$ ,  $g_s$ , WUE ( $A/g_s$ ), SPAD index, and leaf Tm among seven cultivars in response to four different levels of water stress (IRRI\_1 to 4) (A), and eigenvector values of PC1 and PC2. Blue, green, yellow, and red dots represent IRRI\_1, 2, 3, and 4, respectively.

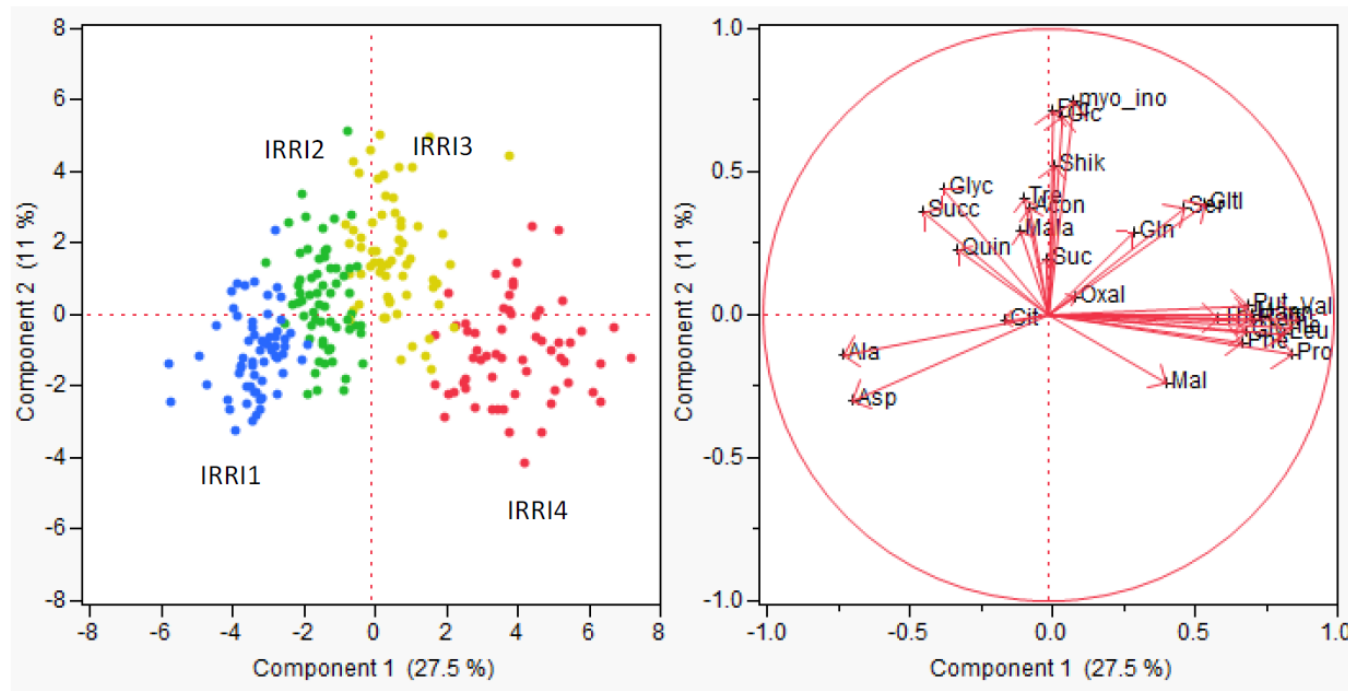

**Figure S3.** Principal component analysis of 26 metabolites among seven cultivars in response to four different levels of water stress (IRRI\_1 to 4) (A), and eigenvector values of PC1 and PC2. Other details are as in Figure S2.

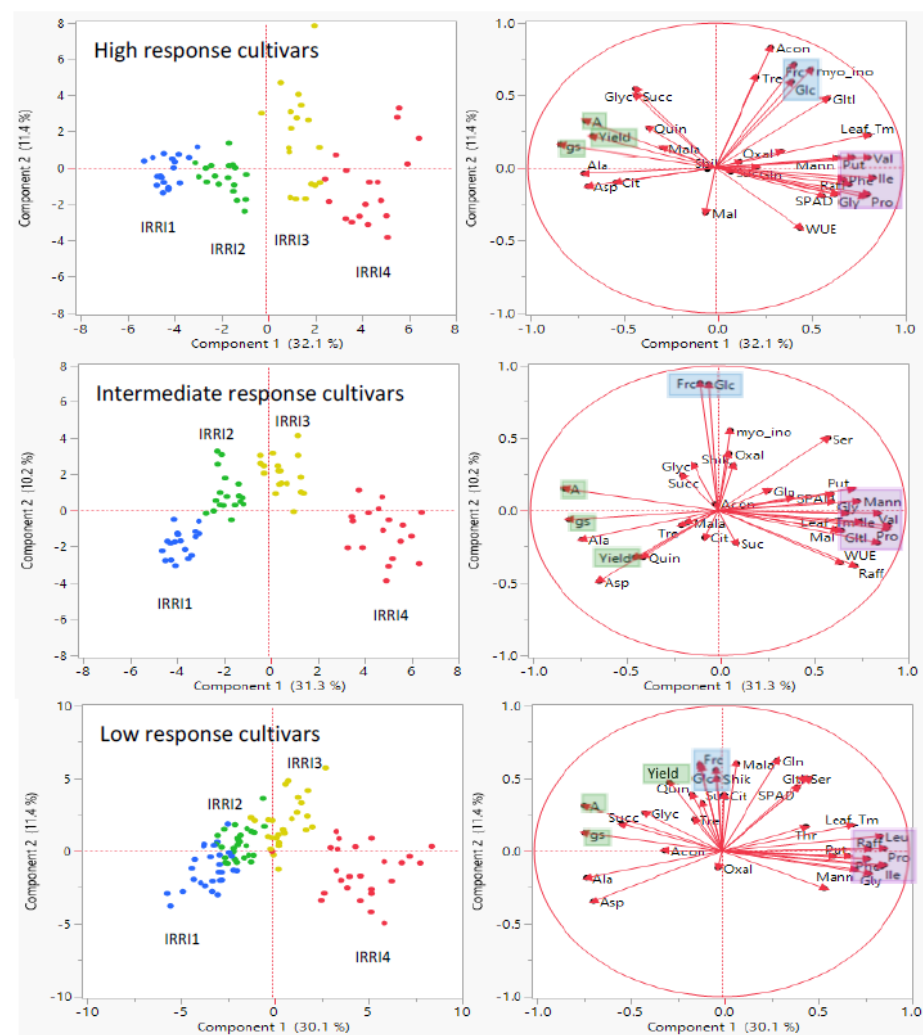

**Figure S4.** Principal component analysis of physiological and metabolic traits among seven cultivars in response to four different levels of water stress (IRRI\_1 to 4) (A), and eigenvector values of PC1 and PC2. Other details are as in Figure S2.

**Table S1A.** Means and SE of yield (grain weight per plant (g)) of 7 rice cultivars under 4 different irrigation levels (IRRI\_1 to 4).

| Yield response category | Cultivars | Year | IRRI_1 |      | IRRI_2 |      | IRRI_3 |       | IRRI_4 |      |
|-------------------------|-----------|------|--------|------|--------|------|--------|-------|--------|------|
|                         |           |      | Mean   | SE   | Mean   | SE   | Mean   | SE    | Mean   | SE   |
| High response           | TQNG      | 2014 | 38.77  | 4.97 | 36.97  | 5.91 | 26.43  | 4.10  | 3.27   | 1.48 |
|                         |           | 2015 | 55.80  | 8.05 | 61.57  | 5.32 | NA     | NA    | 20.90  | 9.88 |
|                         |           | 2016 | 47.00  | 2.78 | 56.00  | 4.91 | 36.67  | 12.48 | 28.50  | 0.58 |
|                         | PI77      | 2014 | 31.60  | 6.13 | 13.47  | 2.69 | 16.90  | 8.07  | 3.73   | 2.14 |
|                         |           | 2015 | 37.30  | 8.99 | 28.47  | 5.82 | NA     | NA    | 20.83  | 2.40 |
|                         |           | 2016 | 47.00  | 3.51 | 36.33  | 7.49 | 26.33  | 5.67  | 20.67  | 5.49 |
| Intermediate response   | LGRU      | 2014 | 25.00  | 1.67 | 19.60  | 4.10 | 18.90  | 0.15  | 7.80   | 4.18 |
|                         |           | 2015 | 13.60  | 0.40 | 19.80  | 4.40 | NA     | NA    | 13.15  | 2.45 |
|                         |           | 2016 | 26.50  | 1.04 | 18.83  | 4.41 | 13.50  | 5.62  | 9.33   | 4.48 |
|                         | LMNT      | 2014 | 16.93  | 0.73 | 16.70  | 4.27 | 9.97   | 3.78  | 4.93   | 3.10 |
|                         |           | 2015 | 15.43  | 3.91 | 6.20   | NA   | NA     | NA    | 13.23  | 9.23 |
|                         |           | 2016 | 17.33  | 2.77 | 19.17  | 1.17 | 16.83  | 4.21  | 4.03   | 2.15 |
| Non- or low response    | FRCS      | 2014 | 38.03  | 1.68 | 17.60  | 8.74 | 27.00  | 12.16 | 20.60  | 7.55 |
|                         |           | 2015 | 31.13  | 5.40 | 48.00  | 4.10 | NA     | NA    | 26.80  | 3.55 |
|                         |           | 2016 | 37.67  | 6.89 | 34.83  | 0.93 | 46.00  | 5.84  | 29.33  | 3.71 |
|                         | KBNT      | 2014 | 16.03  | 6.53 | 10.73  | 4.71 | 18.47  | 10.09 | 4.57   | 1.73 |
|                         |           | 2015 | 13.10  | 3.41 | 8.95   | 1.75 | NA     | NA    | 5.13   | 1.68 |
|                         |           | 2016 | 14.17  | 5.13 | 16.17  | 2.46 | 19.33  | 2.80  | 15.00  | 4.54 |
|                         | SABR      | 2014 | 30.63  | 3.54 | 31.67  | 3.02 | 23.20  | 6.94  | 20.93  | 4.06 |
|                         |           | 2015 | 19.00  | 3.06 | 23.97  | 2.09 | NA     | NA    | 18.43  | 2.07 |
|                         |           | 2016 | 24.50  | 0.76 | 24.33  | 1.74 | 23.33  | 4.85  | 21.17  | 2.35 |

**Table S1.** Analysis of variance of seven cultivars (C) evaluated across four irrigation levels (I) in each of three years for grain weight per plant (g). \*\* and ns indicate  $p < 0.01$  and  $p > 0.01$ , respectively.

| Year | Source of Variation | Prob. > F |
|------|---------------------|-----------|
| 2014 | Cultivar (C)        | **        |
|      | Irrigation (I)      | **        |
|      | C × I               | ns        |
| 2015 | Cultivar (C)        | **        |
|      | Irrigation (I)      | **        |
|      | C × I               | ns        |
| 2016 | Cultivar (C)        | **        |
|      | Irrigation (I)      | **        |
|      | C × I               | ns        |

**Table S2.** Average daily air temperature, soil temperature and total daily solar radiation during vegetative stage (DOE 1 to 103) and reproductive stage (DOE 104 to 154) at Stuttgart, Arkansas from 2014 to 2016. The stage of vegetation/reproduction and grain fill was decided based on heading date in 2016 (Suppl. Table 9).

|                                           | Average air temperature (°C) |      |      | Average soil temperature (°C) |      |      | Total Solar flux (MJ/m <sup>2</sup> ) |      |      |
|-------------------------------------------|------------------------------|------|------|-------------------------------|------|------|---------------------------------------|------|------|
|                                           | 2014                         | 2015 | 2016 | 2014                          | 2015 | 2016 | 2014                                  | 2015 | 2016 |
| Vegetative/reproductive stage (DOE 1-103) | 25.3                         | 21.4 | 27.8 | 25.8                          | 22.7 | 27.7 | 27.2                                  | 23.8 | 29.1 |
| Grain fill stage (DOE 104-154)            | 20.8                         | 17.0 | 22.9 | 25.0                          | 17.7 | 26.8 | 18.6                                  | 13.6 | 21.4 |

**Table 3.** Summary of amount of irrigation applied for IRR1 to 4 in each of three years.

| Treatment |         | Water applied (cm ha <sup>-1</sup> ) |       |       |
|-----------|---------|--------------------------------------|-------|-------|
|           |         | 2014                                 | 2015  | 2016  |
| IRRI1     | 30% VWC | 40.64                                | 78.97 | 87.33 |
| IRRI2     | 24% VWC | 44.63                                | 59.03 | 75.64 |
| IRRI3     | 20% VWC | 37.92                                | 57.02 | 62.97 |
| IRRI4     | 14% VWC | 25.30                                | 40.13 | 43.59 |

**Table S4A.** Mean and SE of physiological traits of 7 rice cultivars under 4 different irrigation levels (IRRI\_1 to 4) in 2016.

| Cultivars | Traits                    | IRRI_1 |      | IRRI_2 |      | IRRI_3 |       | IRRI_4 |       |
|-----------|---------------------------|--------|------|--------|------|--------|-------|--------|-------|
|           |                           | Mean   | SE   | Mean   | SE   | Mean   | SE    | Mean   | SE    |
| FRCS      | A                         | 15.50  | 1.48 | 14.06  | 0.38 | 12.93  | 0.84  | 6.27   | 1.14  |
|           | Gs                        | 0.38   | 0.04 | 0.39   | 0.02 | 0.22   | 0.02  | 0.11   | 0.02  |
|           | WUE (A/g <sub>s</sub> )   | 41.65  | 0.81 | 36.66  | 2.07 | 59.65  | 2.83  | 64.97  | 3.73  |
|           | SPAD                      | 45.07  | 0.93 | 47.70  | 0.56 | 49.13  | 0.67  | 50.50  | 0.22  |
|           | Leaf Tm                   | 89.43  | 0.41 | 89.53  | 0.46 | 90.97  | 0.67  | 93.70  | 0.76  |
|           | Seed weight per plant (g) | 37.67  | 6.89 | 34.83  | 0.93 | 46.00  | 5.84  | 29.33  | 3.71  |
| KBNT      | A                         | 11.25  | 0.24 | 11.34  | 0.17 | 10.30  | 1.62  | 4.82   | 1.23  |
|           | Gs                        | 0.23   | 0.01 | 0.24   | 0.04 | 0.20   | 0.03  | 0.05   | 0.01  |
|           | WUE (A/g <sub>s</sub> )   | 50.14  | 1.75 | 59.11  | 8.14 | 52.84  | 3.83  | 112.99 | 20.83 |
|           | SPAD                      | 41.77  | 1.17 | 43.07  | 1.31 | 45.60  | 1.79  | 45.33  | 0.27  |
|           | Leaf Tm                   | 89.87  | 0.31 | 89.60  | 0.43 | 91.73  | 0.99  | 92.97  | 0.90  |
|           | Seed weight per plant (g) | 14.17  | 5.13 | 16.17  | 2.46 | 19.33  | 2.80  | 15.00  | 4.54  |
| LGRU      | A                         | 15.15  | 0.84 | 14.40  | 0.52 | 13.24  | 0.55  | 4.32   | 0.21  |
|           | Gs                        | 0.44   | 0.06 | 0.33   | 0.01 | 0.20   | 0.01  | 0.02   | 0.00  |
|           | WUE (A/g <sub>s</sub> )   | 39.81  | 5.38 | 44.68  | 2.52 | 65.47  | 1.97  | 258.41 | 33.87 |
|           | SPAD                      | 47.23  | 0.52 | 46.77  | 0.76 | 47.00  | 1.19  | 47.13  | 0.38  |
|           | Leaf Tm                   | 89.27  | 0.34 | 88.20  | 0.77 | 92.03  | 0.66  | 94.30  | 0.79  |
|           | Seed weight per plant (g) | 26.50  | 1.04 | 18.83  | 4.41 | 13.50  | 5.62  | 9.33   | 4.48  |
| LMNT      | A                         | 15.20  | 0.11 | 13.04  | 0.54 | 8.69   | 1.15  | 7.68   | 1.63  |
|           | Gs                        | 0.38   | 0.04 | 0.27   | 0.04 | 0.15   | 0.04  | 0.10   | 0.03  |
|           | WUE (A/g <sub>s</sub> )   | 42.39  | 3.99 | 58.58  | 8.48 | 72.73  | 10.27 | 92.90  | 10.89 |
|           | SPAD                      | 38.23  | 1.14 | 43.40  | 0.34 | 45.80  | 1.13  | 48.17  | 0.02  |
|           | Leaf Tm                   | 88.33  | 0.07 | 89.10  | 0.53 | 91.17  | 0.86  | 94.63  | 1.13  |
|           | Seed weight per plant (g) | 17.33  | 2.77 | 19.17  | 1.17 | 16.83  | 4.21  | 4.03   | 2.15  |
| PI77      | A                         | 14.20  | 0.29 | 14.06  | 0.89 | 12.71  | 1.36  | 8.47   | 1.24  |
|           | Gs                        | 0.86   | 0.06 | 0.42   | 0.07 | 0.32   | 0.06  | 0.15   | 0.04  |
|           | WUE (A/g <sub>s</sub> )   | 17.02  | 0.94 | 39.62  | 4.78 | 43.61  | 3.44  | 160.40 | 54.22 |
|           | SPAD                      | 33.10  | 0.54 | 45.63  | 1.60 | 44.67  | 1.07  | 43.63  | 0.62  |
|           | Leaf Tm                   | 86.30  | 0.09 | 90.33  | 0.57 | 91.47  | 0.73  | 95.97  | 1.38  |
|           | Seed weight per plant (g) | 47.00  | 3.51 | 36.33  | 7.49 | 26.33  | 5.67  | 20.67  | 5.49  |
| SABR      | A                         | 13.44  | 0.28 | 14.13  | 0.59 | 13.20  | 0.81  | 5.38   | 1.37  |



|                           |                           |       |       |       |       |       |       |        |       |
|---------------------------|---------------------------|-------|-------|-------|-------|-------|-------|--------|-------|
| TQNG                      | Gs                        | 0.29  | 0.03  | 0.33  | 0.02  | 0.26  | 0.03  | 0.12   | 0.04  |
|                           | WUE (A/g <sub>s</sub> )   | 48.83 | 3.71  | 43.39 | 1.91  | 55.07 | 4.14  | 53.92  | 0.20  |
|                           | SPAD                      | 35.90 | 1.05  | 41.53 | 0.61  | 46.17 | 2.41  | 42.63  | 0.17  |
|                           | Leaf Tm                   | 88.33 | 0.80  | 89.13 | 0.26  | 91.97 | 0.72  | 93.67  | 1.16  |
|                           | Seed weight per plant (g) | 24.50 | 0.76  | 24.33 | 1.74  | 23.33 | 4.85  | 21.17  | 2.35  |
|                           | A                         | 16.57 | 0.87  | 16.54 | 0.61  | 11.95 | 0.76  | 6.67   | 0.11  |
|                           | Gs                        | 0.63  | 0.05  | 0.59  | 0.05  | 0.26  | 0.05  | 0.06   | 0.01  |
|                           | WUE (A/g <sub>s</sub> )   | 26.89 | 1.27  | 30.04 | 3.14  | 58.55 | 7.72  | 274.31 | 96.34 |
|                           | SPAD                      | 39.73 | 1.22  | 41.80 | 0.13  | 49.07 | 1.64  | 47.90  | 1.05  |
|                           | Leaf Tm                   | 86.90 | 0.44  | 88.27 | 0.33  | 92.60 | 0.84  | 95.77  | 1.16  |
| Seed weight per plant (g) | 47.00                     | 2.78  | 56.00 | 4.91  | 36.67 | 12.48 | 28.50 | 0.58   |       |

**Table S4B.** Summary ANOVAs and C, I, C x I effects for five physiological traits evaluated at four irrigation (I) levels of seven varieties (C) during 2016. \*\* indicates  $p < 0.01$ .

|                         | Cultivar (C) | Irrigation (I) | C x I |
|-------------------------|--------------|----------------|-------|
| A                       | **           | **             | **    |
| Gs                      | **           | **             | **    |
| WUE (A/g <sub>s</sub> ) | **           | **             | **    |
| Leaf Tm                 | ns           | **             | **    |
| SPAD                    | **           | **             | **    |
| Seed Weight             | **           | **             | *     |

**Table S5A.** Means and SE of metabolites of 7 rice cultivars under 4 different irrigation levels (IRRI\_1 to 4) during 2016.

| Cultivars | Metabolite | IRRI 1  |         | IRRI 2  |        | IRRI 3  |         | IRRI 4  |        |
|-----------|------------|---------|---------|---------|--------|---------|---------|---------|--------|
|           |            | Mean    | SE      | Mean    | SE     | Mean    | SE      | Mean    | SE     |
| FRCS      | Val        | 18.07   | 2.23    | 54.18   | 6.19   | 84.76   | 8.29    | 156.17  | 19.54  |
|           | Phe        | 10.27   | 1.03    | 28.49   | 3.10   | 38.31   | 7.83    | 103.13  | 14.28  |
|           | Ser        | 188.97  | 15.46   | 261.27  | 32.84  | 564.36  | 51.31   | 489.48  | 83.43  |
|           | Gln        | 3694.49 | 1013.19 | 4037.87 | 630.12 | 8902.52 | 1214.89 | 6563.92 | 563.87 |
|           | Ala        | 762.80  | 54.89   | 766.54  | 60.07  | 506.08  | 59.01   | 291.75  | 32.08  |
|           | Asp        | 1311.58 | 94.35   | 655.58  | 51.48  | 282.99  | 37.88   | 108.08  | 11.05  |

|             |                |          |         |          |         |          |         |          |         |
|-------------|----------------|----------|---------|----------|---------|----------|---------|----------|---------|
|             | <b>Pro</b>     | 9.23     | 0.02    | 12.11    | 1.55    | 43.99    | 1.73    | 88.85    | 10.44   |
|             | <b>Thr</b>     | 77.67    | 9.13    | 198.33   | 49.87   | 214.30   | 62.71   | 283.15   | 74.21   |
|             | <b>Frc</b>     | 4344.14  | 645.19  | 10842.47 | 1035.88 | 10311.68 | 1061.73 | 5286.02  | 521.39  |
|             | <b>Glc</b>     | 3758.99  | 591.89  | 11144.64 | 1590.30 | 12367.92 | 1313.53 | 5025.83  | 467.88  |
|             | <b>myo-ino</b> | 387.00   | 80.20   | 727.59   | 65.34   | 833.30   | 106.39  | 549.92   | 55.74   |
|             | <b>Gltl</b>    | 23.50    | 4.09    | 68.50    | 16.18   | 62.87    | 15.57   | 85.82    | 12.67   |
|             | <b>Suc</b>     | 57873.13 | 3423.69 | 74035.12 | 2664.20 | 72152.64 | 2502.75 | 56110.88 | 3304.07 |
|             | <b>Mann</b>    | 9.21     | 0.03    | 10.20    | 1.06    | 20.24    | 5.17    | 34.20    | 4.43    |
|             | <b>Tre</b>     | 30.66    | 5.91    | 34.81    | 4.10    | 27.41    | 5.25    | 38.25    | 6.78    |
|             | <b>Raff</b>    | 247.80   | 32.66   | 470.06   | 45.42   | 1226.39  | 140.23  | 3089.25  | 478.71  |
|             | <b>Mal</b>     | 22.54    | 2.24    | 19.37    | 2.82    | 23.53    | 1.60    | 49.77    | 5.74    |
|             | <b>Succ</b>    | 47.05    | 3.67    | 46.86    | 6.59    | 52.71    | 4.62    | 39.79    | 5.62    |
|             | <b>Cit</b>     | 481.04   | 201.79  | 263.22   | 120.93  | 880.94   | 235.28  | 735.78   | 228.87  |
|             | <b>Oxal</b>    | 154.33   | 32.26   | 431.00   | 157.87  | 278.88   | 109.49  | 446.18   | 110.37  |
|             | <b>Glyc</b>    | 262.16   | 37.64   | 269.55   | 42.88   | 414.33   | 51.42   | 201.22   | 24.74   |
|             | <b>Mala</b>    | 555.04   | 209.97  | 382.57   | 110.54  | 1872.35  | 254.64  | 771.46   | 287.42  |
|             | <b>Acon</b>    | 207.19   | 24.86   | 164.75   | 27.87   | 57.99    | 7.73    | 47.85    | 12.08   |
|             | <b>Quin</b>    | 125.75   | 35.98   | 108.15   | 34.12   | 203.66   | 66.57   | 61.67    | 7.41    |
|             | <b>Shik</b>    | 207.00   | 30.61   | 224.43   | 74.13   | 404.49   | 77.07   | 169.82   | 28.70   |
|             | <b>Put</b>     | 12.12    | 1.56    | 19.49    | 2.46    | 22.31    | 2.17    | 32.65    | 2.04    |
| <b>KBNT</b> | <b>Val</b>     | 13.36    | 2.24    | 29.79    | 3.34    | 70.78    | 5.04    | 114.03   | 8.02    |
|             | <b>Phe</b>     | 9.28     | 0.01    | 19.37    | 3.25    | 46.66    | 4.18    | 145.03   | 32.68   |
|             | <b>Ser</b>     | 236.39   | 25.89   | 443.62   | 69.98   | 317.68   | 44.24   | 363.32   | 84.73   |
|             | <b>Gln</b>     | 4001.43  | 514.92  | 4817.82  | 422.51  | 6634.58  | 740.58  | 4472.39  | 1035.13 |
|             | <b>Ala</b>     | 788.13   | 107.57  | 495.34   | 58.99   | 397.82   | 39.05   | 232.41   | 31.08   |
|             | <b>Asp</b>     | 1590.16  | 172.85  | 513.62   | 39.54   | 213.76   | 35.25   | 175.96   | 31.11   |
|             | <b>Pro</b>     | 8.47     | 0.81    | 20.32    | 2.49    | 34.18    | 3.43    | 72.14    | 9.78    |
|             | <b>Thr</b>     | 98.26    | 14.94   | 137.04   | 29.21   | 108.00   | 13.58   | 151.32   | 17.89   |

|             |                |          |         |          |         |          |         |          |         |
|-------------|----------------|----------|---------|----------|---------|----------|---------|----------|---------|
|             | <b>Frc</b>     | 2736.39  | 503.35  | 6964.94  | 568.55  | 7319.36  | 719.02  | 3637.07  | 409.66  |
|             | <b>Glc</b>     | 2724.64  | 399.09  | 10991.46 | 4291.00 | 8968.89  | 821.42  | 4065.20  | 569.77  |
|             | <b>myo-ino</b> | 609.21   | 118.11  | 837.36   | 70.35   | 832.40   | 57.37   | 407.32   | 85.78   |
|             | <b>GltI</b>    | 46.48    | 18.97   | 45.42    | 9.97    | 81.52    | 16.99   | 73.61    | 15.16   |
|             | <b>Suc</b>     | 66965.93 | 4319.29 | 63609.42 | 3061.11 | 66844.36 | 3297.09 | 62377.41 | 4504.40 |
|             | <b>Mann</b>    | 10.34    | 1.03    | 13.42    | 1.62    | 20.57    | 2.06    | 39.27    | 5.30    |
|             | <b>Tre</b>     | 26.89    | 2.44    | 42.36    | 4.16    | 38.71    | 4.76    | 18.41    | 3.13    |
|             | <b>Raff</b>    | 170.16   | 12.12   | 437.97   | 72.32   | 2016.40  | 522.90  | 3303.93  | 279.19  |
|             | <b>Mal</b>     | 12.39    | 2.19    | 18.64    | 2.21    | 15.32    | 1.53    | 35.81    | 6.83    |
|             | <b>Succ</b>    | 66.16    | 4.26    | 77.55    | 10.65   | 47.85    | 4.58    | 22.52    | 3.16    |
|             | <b>Cit</b>     | 227.98   | 57.89   | 568.03   | 145.58  | 290.06   | 78.42   | 204.30   | 52.82   |
|             | <b>Oxal</b>    | 195.54   | 40.35   | 476.54   | 196.86  | 453.01   | 99.33   | 331.89   | 32.89   |
|             | <b>Glyc</b>    | 469.27   | 43.40   | 552.23   | 81.12   | 381.32   | 82.99   | 186.42   | 24.69   |
|             | <b>Mala</b>    | 1255.14  | 339.00  | 754.54   | 163.37  | 1196.38  | 244.96  | 583.44   | 257.69  |
|             | <b>Acon</b>    | 115.71   | 26.28   | 93.70    | 11.07   | 130.17   | 17.97   | 119.06   | 29.90   |
|             | <b>Quin</b>    | 311.65   | 77.24   | 164.63   | 36.64   | 395.82   | 139.81  | 33.81    | 9.41    |
|             | <b>Shik</b>    | 220.30   | 38.30   | 235.48   | 57.92   | 527.17   | 81.00   | 168.28   | 22.80   |
|             | <b>Put</b>     | 13.37    | 1.66    | 13.36    | 2.25    | 21.71    | 1.57    | 33.04    | 2.81    |
| <b>LGRU</b> | <b>Val</b>     | 21.53    | 4.61    | 28.43    | 4.04    | 51.43    | 2.76    | 130.04   | 15.59   |
|             | <b>Phe</b>     | 9.26     | 0.02    | 9.36     | 0.02    | 60.58    | 14.78   | 97.04    | 30.39   |
|             | <b>Ser</b>     | 153.61   | 11.34   | 230.26   | 30.11   | 562.09   | 41.11   | 399.32   | 61.27   |
|             | <b>Gln</b>     | 1785.48  | 299.20  | 4232.98  | 423.16  | 6171.72  | 1127.71 | 6555.10  | 760.52  |
|             | <b>Ala</b>     | 905.02   | 75.37   | 503.27   | 27.75   | 573.31   | 49.42   | 265.73   | 33.94   |
|             | <b>Asp</b>     | 1781.12  | 295.31  | 356.71   | 42.66   | 200.44   | 36.36   | 163.02   | 28.39   |
|             | <b>Pro</b>     | 9.30     | 0.03    | 13.47    | 1.62    | 45.48    | 5.39    | 89.80    | 5.53    |
|             | <b>Thr</b>     | 58.30    | 14.22   | 73.00    | 20.92   | 198.06   | 34.20   | 248.46   | 55.11   |
|             | <b>Frc</b>     | 2789.82  | 410.41  | 10111.79 | 1670.41 | 11362.23 | 965.35  | 2394.74  | 411.07  |
|             | <b>Glc</b>     | 2646.02  | 522.51  | 12154.40 | 2100.81 | 13334.64 | 976.60  | 2834.54  | 420.57  |

|             |                |                |         |          |         |          |         |          |         |       |
|-------------|----------------|----------------|---------|----------|---------|----------|---------|----------|---------|-------|
|             | <b>myo-ino</b> | 417.97         | 90.43   | 628.87   | 81.71   | 740.61   | 93.41   | 423.41   | 65.72   |       |
|             | <b>Gtl</b>     | 17.47          | 3.63    | 19.49    | 2.89    | 24.67    | 3.41    | 93.18    | 24.03   |       |
|             | <b>Suc</b>     | 65927.88       | 2809.36 | 61772.83 | 2700.26 | 56661.61 | 3716.80 | 67092.01 | 3855.31 |       |
|             | <b>Mann</b>    | 12.33          | 1.54    | 15.43    | 2.21    | 23.90    | 3.52    | 36.46    | 4.46    |       |
|             | <b>Tre</b>     | 49.46          | 8.49    | 33.80    | 5.72    | 29.93    | 6.21    | 30.69    | 4.73    |       |
|             | <b>Raff</b>    | 300.17         | 11.35   | 323.37   | 28.28   | 379.18   | 44.79   | 4188.19  | 700.27  |       |
|             | <b>Mal</b>     | 12.38          | 2.26    | 18.70    | 2.78    | 21.70    | 2.29    | 43.77    | 4.48    |       |
|             | <b>Succ</b>    | 34.87          | 6.24    | 63.53    | 5.95    | 54.53    | 6.53    | 50.98    | 8.85    |       |
|             | <b>Cit</b>     | 331.64         | 107.35  | 635.46   | 73.61   | 274.92   | 44.90   | 557.33   | 125.32  |       |
|             | <b>Oxal</b>    | 190.21         | 35.29   | 630.59   | 257.26  | 581.89   | 190.77  | 307.59   | 61.43   |       |
|             | <b>Glyc</b>    | 286.14         | 41.29   | 355.62   | 45.44   | 501.12   | 77.21   | 322.88   | 73.13   |       |
|             | <b>Mala</b>    | 792.60         | 290.30  | 821.28   | 100.73  | 1070.39  | 186.71  | 935.36   | 228.52  |       |
|             | <b>Acon</b>    | 140.45         | 41.79   | 117.23   | 16.65   | 35.93    | 9.79    | 84.17    | 12.48   |       |
|             | <b>Quin</b>    | 724.37         | 206.01  | 80.98    | 10.16   | 122.35   | 36.88   | 83.71    | 24.51   |       |
|             |                | <b>Shik</b>    | 166.16  | 30.59    | 185.40  | 20.78    | 220.15  | 44.08    | 215.16  | 43.72 |
|             | <b>Put</b>     | 10.31          | 1.06    | 16.57    | 3.05    | 21.78    | 4.40    | 29.04    | 4.55    |       |
| <b>LMNT</b> | <b>Val</b>     | 17.34          | 2.37    | 30.66    | 4.95    | 75.04    | 5.17    | 159.99   | 11.60   |       |
|             | <b>Phe</b>     | 9.23           | 0.02    | 13.16    | 1.60    | 27.23    | 2.63    | 75.32    | 16.36   |       |
|             | <b>Ser</b>     | 202.48         | 26.16   | 309.21   | 40.30   | 462.67   | 42.04   | 444.51   | 44.28   |       |
|             | <b>Gln</b>     | 6110.24        | 1027.15 | 5584.34  | 576.96  | 5716.14  | 937.43  | 4846.67  | 639.37  |       |
|             | <b>Ala</b>     | 987.61         | 126.17  | 660.02   | 54.47   | 425.34   | 44.43   | 348.57   | 49.32   |       |
|             | <b>Asp</b>     | 1968.46        | 232.61  | 384.77   | 66.08   | 157.34   | 15.79   | 159.86   | 33.67   |       |
|             | <b>Pro</b>     | 14.30          | 3.53    | 21.71    | 3.48    | 37.36    | 2.24    | 86.79    | 11.23   |       |
|             | <b>Thr</b>     | 117.41         | 44.13   | 115.24   | 16.20   | 240.46   | 41.83   | 273.54   | 43.95   |       |
|             | <b>Frc</b>     | 2895.71        | 368.78  | 5753.56  | 721.56  | 8733.07  | 770.04  | 4226.47  | 795.38  |       |
|             | <b>Glc</b>     | 3170.41        | 371.15  | 5703.28  | 771.30  | 10311.91 | 1451.26 | 4909.32  | 897.93  |       |
|             |                | <b>myo-ino</b> | 502.93  | 57.21    | 842.08  | 61.95    | 881.26  | 119.80   | 698.24  | 63.47 |
|             |                | <b>Gtl</b>     | 32.97   | 6.39     | 45.86   | 8.71     | 71.78   | 9.00     | 107.52  | 11.77 |

|             |                |          |         |          |         |          |         |          |         |
|-------------|----------------|----------|---------|----------|---------|----------|---------|----------|---------|
|             | <b>Suc</b>     | 63218.04 | 2702.43 | 60020.26 | 3278.24 | 69092.00 | 4156.21 | 65074.44 | 4359.91 |
|             | <b>Mann</b>    | 11.36    | 1.39    | 28.89    | 3.83    | 26.86    | 2.48    | 42.74    | 4.52    |
|             | <b>Tre</b>     | 36.94    | 4.88    | 40.81    | 7.16    | 42.88    | 9.65    | 31.71    | 2.68    |
|             | <b>Raff</b>    | 481.17   | 40.87   | 575.51   | 51.84   | 1429.83  | 202.45  | 2726.70  | 572.32  |
|             | <b>Mal</b>     | 14.27    | 1.63    | 17.41    | 1.86    | 18.41    | 2.19    | 23.69    | 3.46    |
|             | <b>Succ</b>    | 63.87    | 4.22    | 74.42    | 12.40   | 53.15    | 6.71    | 39.95    | 7.01    |
|             | <b>Cit</b>     | 566.15   | 205.06  | 485.87   | 76.64   | 333.64   | 62.82   | 317.38   | 71.55   |
|             | <b>Oxal</b>    | 259.85   | 99.15   | 763.27   | 305.36  | 726.71   | 209.97  | 407.79   | 116.05  |
|             | <b>Glyc</b>    | 416.67   | 48.54   | 385.63   | 59.96   | 427.43   | 83.16   | 254.79   | 54.45   |
|             | <b>Mala</b>    | 1486.04  | 378.89  | 1137.60  | 212.69  | 747.14   | 144.83  | 718.10   | 209.05  |
|             | <b>Acon</b>    | 96.74    | 19.40   | 142.22   | 31.03   | 148.83   | 38.63   | 155.51   | 36.37   |
|             | <b>Quin</b>    | 336.04   | 85.65   | 139.88   | 32.45   | 253.63   | 40.00   | 102.19   | 39.09   |
|             | <b>Shik</b>    | 255.79   | 54.80   | 343.49   | 59.53   | 603.02   | 71.29   | 267.79   | 83.52   |
|             | <b>Put</b>     | 11.29    | 1.34    | 15.30    | 2.20    | 30.96    | 2.19    | 44.69    | 4.91    |
| <b>PI77</b> | <b>Val</b>     | 17.20    | 2.38    | 30.11    | 4.23    | 91.36    | 10.85   | 124.82   | 20.57   |
|             | <b>Phe</b>     | 11.33    | 1.39    | 17.50    | 2.43    | 59.01    | 15.34   | 127.96   | 5.98    |
|             | <b>Ser</b>     | 243.02   | 46.30   | 301.38   | 30.34   | 426.61   | 65.83   | 346.86   | 52.55   |
|             | <b>Gln</b>     | 3920.24  | 773.49  | 6030.20  | 788.29  | 6534.31  | 541.83  | 4342.12  | 437.83  |
|             | <b>Ala</b>     | 722.16   | 52.90   | 528.00   | 47.73   | 355.67   | 45.03   | 262.13   | 29.12   |
|             | <b>Asp</b>     | 1551.57  | 115.27  | 619.80   | 85.19   | 324.37   | 55.27   | 194.66   | 32.03   |
|             | <b>Pro</b>     | 12.40    | 1.55    | 20.70    | 2.08    | 27.91    | 2.17    | 90.83    | 10.05   |
|             | <b>Thr</b>     | 86.57    | 25.18   | 123.22   | 21.66   | 195.96   | 42.32   | 317.94   | 76.35   |
|             | <b>Frc</b>     | 2216.07  | 388.42  | 2692.67  | 194.99  | 6916.41  | 1688.08 | 4652.79  | 584.46  |
|             | <b>Glc</b>     | 2335.77  | 295.25  | 2970.37  | 227.20  | 7155.20  | 1778.23 | 4357.96  | 457.07  |
|             | <b>myo-ino</b> | 215.13   | 32.06   | 340.43   | 50.42   | 728.97   | 114.01  | 542.57   | 106.86  |
|             | <b>Gtl</b>     | 24.78    | 5.84    | 12.37    | 1.56    | 65.69    | 15.19   | 82.69    | 23.49   |
|             | <b>Suc</b>     | 58987.82 | 3891.80 | 65382.66 | 4773.03 | 67060.22 | 3921.35 | 59584.06 | 1411.42 |
| <b>Mann</b> | 14.76          | 1.76     | 18.58   | 2.70     | 24.18   | 3.42     | 44.73   | 4.59     |         |

|             |                |          |         |          |         |          |         |          |         |
|-------------|----------------|----------|---------|----------|---------|----------|---------|----------|---------|
|             | <b>Tre</b>     | 24.71    | 2.64    | 21.48    | 3.94    | 41.82    | 8.56    | 35.86    | 5.80    |
|             | <b>Raff</b>    | 233.37   | 36.65   | 400.88   | 59.43   | 727.13   | 77.55   | 2267.04  | 313.50  |
|             | <b>Mal</b>     | 31.29    | 4.09    | 32.91    | 4.40    | 16.51    | 2.09    | 21.89    | 6.10    |
|             | <b>Succ</b>    | 67.08    | 8.37    | 47.23    | 3.52    | 58.51    | 7.52    | 35.74    | 5.29    |
|             | <b>Cit</b>     | 1145.01  | 175.11  | 536.79   | 86.40   | 347.27   | 33.60   | 95.51    | 13.48   |
|             | <b>Oxal</b>    | 545.90   | 198.95  | 299.38   | 176.02  | 770.56   | 222.23  | 379.67   | 81.78   |
|             | <b>Glyc</b>    | 371.98   | 72.32   | 431.65   | 55.57   | 419.26   | 58.35   | 213.15   | 21.65   |
|             | <b>Mala</b>    | 1526.20  | 173.27  | 841.12   | 280.41  | 1029.74  | 279.22  | 105.31   | 11.43   |
|             | <b>Acon</b>    | 76.23    | 8.53    | 52.22    | 11.49   | 164.26   | 43.47   | 148.00   | 39.22   |
|             | <b>Quin</b>    | 322.94   | 79.90   | 70.12    | 44.80   | 118.03   | 52.41   | 39.91    | 5.87    |
|             | <b>Shik</b>    | 245.56   | 43.35   | 394.67   | 34.47   | 250.19   | 45.34   | 128.62   | 13.04   |
| <b>Put</b>  | 10.23          | 0.97     | 15.57   | 3.13     | 24.13   | 2.26     | 39.48   | 4.45     |         |
| <b>SABR</b> | <b>Val</b>     | 14.38    | 2.28    | 23.77    | 4.44    | 40.83    | 4.90    | 94.76    | 11.07   |
|             | <b>Phe</b>     | 9.24     | 0.03    | 21.62    | 2.67    | 71.07    | 15.75   | 87.94    | 14.07   |
|             | <b>Ser</b>     | 167.24   | 21.09   | 313.28   | 44.94   | 295.97   | 53.28   | 280.63   | 26.77   |
|             | <b>Gln</b>     | 3396.18  | 723.62  | 4969.00  | 477.72  | 6848.40  | 1261.85 | 4573.56  | 440.96  |
|             | <b>Ala</b>     | 1078.78  | 123.03  | 612.86   | 31.15   | 356.00   | 43.02   | 380.81   | 34.46   |
|             | <b>Asp</b>     | 2864.47  | 337.29  | 946.52   | 209.19  | 305.70   | 55.71   | 194.76   | 31.87   |
|             | <b>Pro</b>     | 9.30     | 0.03    | 19.38    | 2.76    | 41.04    | 2.81    | 87.69    | 8.59    |
|             | <b>Thr</b>     | 66.99    | 16.69   | 118.60   | 21.41   | 97.36    | 21.82   | 219.29   | 41.88   |
|             | <b>Frc</b>     | 2750.99  | 283.00  | 7866.80  | 1151.60 | 8942.77  | 1980.82 | 1968.79  | 272.00  |
|             | <b>Glc</b>     | 2032.26  | 398.69  | 7621.39  | 1122.87 | 10985.32 | 1901.39 | 2500.83  | 450.86  |
|             | <b>myo-ino</b> | 544.71   | 63.91   | 688.14   | 59.51   | 876.34   | 113.53  | 405.86   | 47.17   |
|             | <b>GltI</b>    | 20.52    | 4.57    | 51.40    | 12.30   | 66.74    | 7.77    | 76.69    | 14.51   |
|             | <b>Suc</b>     | 66592.66 | 3403.44 | 65764.01 | 3366.98 | 67971.33 | 3876.21 | 62139.28 | 3761.55 |
|             | <b>Mann</b>    | 11.27    | 1.30    | 14.56    | 2.27    | 27.99    | 4.12    | 33.43    | 4.55    |
|             | <b>Tre</b>     | 36.02    | 4.55    | 33.66    | 5.14    | 33.93    | 4.69    | 28.67    | 1.83    |
| <b>Raff</b> | 349.57         | 41.68    | 671.74  | 97.45    | 1295.21 | 287.40   | 3107.40 | 634.71   |         |

|             |                |          |         |          |         |          |         |          |         |
|-------------|----------------|----------|---------|----------|---------|----------|---------|----------|---------|
|             | <b>Mal</b>     | 13.32    | 1.67    | 16.39    | 2.50    | 20.44    | 2.53    | 25.68    | 3.02    |
|             | <b>Succ</b>    | 94.47    | 11.09   | 78.10    | 11.45   | 53.32    | 8.70    | 37.86    | 3.20    |
|             | <b>Cit</b>     | 456.34   | 113.19  | 567.66   | 130.17  | 556.78   | 127.67  | 506.03   | 135.56  |
|             | <b>Oxal</b>    | 810.26   | 263.94  | 497.69   | 172.02  | 591.41   | 165.17  | 478.93   | 109.36  |
|             | <b>Glyc</b>    | 513.04   | 44.96   | 369.95   | 50.80   | 341.26   | 45.12   | 271.85   | 32.05   |
|             | <b>Mala</b>    | 1009.00  | 253.01  | 986.52   | 211.57  | 1290.18  | 306.92  | 1120.56  | 373.55  |
|             | <b>Acon</b>    | 132.06   | 27.50   | 111.12   | 19.30   | 132.37   | 54.74   | 73.05    | 11.21   |
|             | <b>Quin</b>    | 166.62   | 29.77   | 77.38    | 16.90   | 157.41   | 38.02   | 68.51    | 11.47   |
|             | <b>Shik</b>    | 233.00   | 37.45   | 171.02   | 18.69   | 264.70   | 48.89   | 189.96   | 32.32   |
|             | <b>Put</b>     | 13.30    | 2.24    | 17.51    | 2.44    | 27.92    | 3.83    | 35.20    | 3.72    |
| <b>TQNG</b> | <b>Val</b>     | 21.54    | 5.09    | 37.20    | 4.27    | 91.94    | 8.84    | 105.20   | 6.14    |
|             | <b>Phe</b>     | 9.18     | 0.03    | 47.61    | 17.37   | 59.73    | 9.80    | 73.82    | 15.21   |
|             | <b>Ser</b>     | 169.12   | 23.43   | 352.81   | 57.94   | 488.09   | 41.65   | 270.78   | 35.14   |
|             | <b>Gln</b>     | 2449.03  | 209.38  | 7514.02  | 1202.56 | 5079.52  | 557.46  | 6296.48  | 1252.83 |
|             | <b>Ala</b>     | 609.68   | 81.50   | 506.94   | 37.41   | 368.27   | 24.21   | 412.54   | 41.75   |
|             | <b>Asp</b>     | 1660.68  | 415.37  | 323.24   | 46.52   | 302.59   | 37.56   | 156.04   | 26.24   |
|             | <b>Pro</b>     | 10.19    | 1.04    | 13.36    | 2.27    | 32.48    | 4.70    | 50.12    | 6.97    |
|             | <b>Thr</b>     | 36.93    | 8.20    | 193.91   | 50.56   | 247.60   | 44.60   | 236.63   | 47.32   |
|             | <b>Frc</b>     | 1836.74  | 348.84  | 2553.46  | 457.85  | 6379.89  | 480.83  | 3449.59  | 420.27  |
|             | <b>Glc</b>     | 1502.21  | 356.54  | 2829.20  | 530.50  | 8026.53  | 617.01  | 3871.60  | 361.28  |
|             | <b>myo-ino</b> | 277.80   | 32.78   | 322.79   | 33.71   | 734.00   | 68.59   | 454.96   | 44.60   |
|             | <b>GltI</b>    | 14.30    | 1.62    | 36.02    | 9.63    | 64.82    | 13.51   | 70.41    | 8.27    |
|             | <b>Suc</b>     | 66725.58 | 2422.03 | 66522.28 | 3355.69 | 64749.16 | 4479.54 | 68542.93 | 4247.13 |
|             | <b>Mann</b>    | 11.14    | 1.29    | 11.23    | 1.34    | 14.38    | 1.60    | 22.70    | 3.78    |
|             | <b>Tre</b>     | 29.69    | 3.30    | 19.53    | 2.43    | 25.73    | 4.60    | 24.51    | 2.12    |
|             | <b>Raff</b>    | 222.51   | 24.31   | 229.89   | 29.70   | 626.97   | 142.49  | 2876.76  | 669.96  |
| <b>Mal</b>  | 9.21           | 0.04     | 19.61   | 2.42     | 24.68   | 3.45     | 20.56   | 3.01     |         |
| <b>Succ</b> | 62.48          | 5.26     | 46.13   | 5.11     | 53.27   | 8.06     | 35.73   | 4.11     |         |

|             |        |        |         |        |        |        |        |        |
|-------------|--------|--------|---------|--------|--------|--------|--------|--------|
| <b>Cit</b>  | 698.68 | 161.46 | 423.19  | 70.22  | 543.30 | 128.91 | 454.13 | 75.60  |
| <b>Oxal</b> | 164.70 | 42.64  | 593.12  | 186.52 | 656.58 | 140.39 | 692.29 | 168.70 |
| <b>Glyc</b> | 445.00 | 48.06  | 371.70  | 48.59  | 329.38 | 81.52  | 192.02 | 31.40  |
| <b>Mala</b> | 599.50 | 138.04 | 1097.61 | 310.63 | 474.43 | 111.58 | 973.58 | 279.99 |
| <b>Acon</b> | 72.15  | 10.30  | 93.47   | 10.88  | 128.76 | 37.99  | 82.79  | 10.23  |
| <b>Quin</b> | 156.75 | 52.62  | 32.35   | 3.47   | 99.77  | 34.36  | 71.42  | 29.11  |
| <b>Shik</b> | 149.42 | 15.67  | 124.32  | 13.24  | 188.06 | 39.42  | 298.50 | 52.31  |
| <b>Put</b>  | 11.23  | 1.32   | 13.24   | 1.58   | 15.39  | 1.53   | 26.89  | 2.47   |

**Table S5B.** Summary of C, I, C x I of metabolites. *p*-value were calculated for each effect using seven cultivars (C), four irrigations (I), and their interaction (C x I). \*\* and ns indicate  $p < 0.01$  and  $p > 0.01$ , respectively.

| Metabolite     | C  | I  | C x I |
|----------------|----|----|-------|
| <b>Ala</b>     | ** | ** | **    |
| <b>Asp</b>     | ** | ** | **    |
| <b>Leu</b>     | ** | ** | **    |
| <b>Pro</b>     | ** | ** | **    |
| <b>Val</b>     | ** | ** | **    |
| <b>Ser</b>     | *  | ** | **    |
| <b>Frc</b>     | ** | ** | **    |
| <b>Glc</b>     | ** | ** | **    |
| <b>Mal</b>     | ** | ** | **    |
| <b>myo-ino</b> | ** | ** | **    |
| <b>Quin</b>    | ** | ** | **    |
| <b>Shik</b>    | ** | ** | **    |
| <b>Succ</b>    | ** | ** | **    |
| <b>Gln</b>     | ns | ** | **    |
| <b>Glyc</b>    | ns | ** | *     |
| <b>Phe</b>     | ns | ** | *     |
| <b>Mala</b>    | ns | *  | **    |
| <b>Raff</b>    | ns | ** | **    |
| <b>Tre</b>     | *  | ns | **    |
| <b>Acon</b>    | ns | ns | **    |



|             |    |    |    |
|-------------|----|----|----|
| <b>Cit</b>  | ns | ns | ** |
| <b>Suc</b>  | ns | ns | *  |
| <b>Gly</b>  | ns | ** | ns |
| <b>Ile</b>  | ns | ** | ns |
| <b>Oxal</b> | ns | *  | ns |
| <b>Gltl</b> | *  | ** | ns |
| <b>Mann</b> | ** | ** | ns |
| <b>Put</b>  | ** | ** | ns |
| <b>Thr</b>  | *  | ** | ns |

**Table S6.** Summary of correlation between grain yield and 5 physiological traits. Correlation coefficients and  $p$ -value were calculated by using data from all four irrigation levels to include the effects of water stress. \*\* indicates  $p < 0.01$ .

| Var 1 | Var 2                           | Correlation coefficient | $p$ -value |
|-------|---------------------------------|-------------------------|------------|
| Yield | <b>A</b>                        | 0.43                    | **         |
|       | <b><math>g_s</math></b>         | 0.53                    | **         |
|       | <b>WUE (A/<math>g_s</math>)</b> | -0.24                   | **         |
|       | <b>Leaf Tm</b>                  | -0.17                   | **         |
|       | <b>SPAD</b>                     | -0.27                   | **         |

**Table S7.** Summary of visible stress symptoms in response to IRR1\_1 to IRR1\_4 were recorded on the same date when metabolic samples and physiological data (84 DOE) were collected in 2016.

| Yield performance     | Cultivar    | IRRI_1      | IRRI_2      | IRRI3       | IRRI_4               |
|-----------------------|-------------|-------------|-------------|-------------|----------------------|
| High response         | <b>TQNG</b> | No symptoms | No symptoms | No symptoms | No symptoms          |
|                       | <b>PI77</b> | No symptoms | No symptoms | No symptoms | No symptoms          |
| Intermediate response | <b>LGRU</b> | No symptoms | No symptoms | No symptoms | Wilted, leaf curling |
|                       | <b>LMNT</b> | No symptoms | No symptoms | No symptoms | Wilted, leaf curling |
| Non- or low response  | <b>KBNT</b> | No symptoms | No symptoms | No symptoms | Wilted, leaf curling |
|                       | <b>SABR</b> | No symptoms | No symptoms | No symptoms | Wilted, leaf curling |
|                       | <b>FRCS</b> | No symptoms | No symptoms | No symptoms | No symptoms          |

**Table S8.** Bivariate fit of metabolites as a function of % volumetric water content (VWC) as determined by irrigation treatment. Polynomial fits of high, intermediate, and low response cultivars were calculated respectively. H, I, L represent high, intermediate, and low response cultivars. \*\*, \* and ns indicate  $p < 0.01$ ,  $p < 0.05$  and  $p > 0.05$ , respectively.

|           | IRRI. Treat | Metabolites | Yield response category | RSquare Adj | Prob > F |          | Intercept (Prob> t ) |          | IRRI. Treat (Prob> t ) |             | (IRRI. Treat-25.1084)^2 (Prob> t ) |    |
|-----------|-------------|-------------|-------------------------|-------------|----------|----------|----------------------|----------|------------------------|-------------|------------------------------------|----|
|           |             |             |                         |             |          |          |                      |          |                        |             |                                    |    |
| Cluster 1 | % VWC       | Frc         | H                       | 0.22        | 7.78E-05 | **       | 5.23E-12             | **       | 0.000273               | **          | 0.226394198                        | ns |
|           |             |             | I                       | 0.42        | 1.97E-09 | **       | 2.8E-10              | **       | 0.767263               | ns          | 1.11348E-09                        | ** |
|           |             |             | L                       | 0.42        | 2.28E-13 | **       | 9.14E-13             | **       | 0.166561               | ns          | 7.32196E-14                        | ** |
|           | % VWC       | Glc         | H                       | 0.25        | 1.58E-05 | **       | 1.81E-12             | **       | 0.000268               | **          | 0.063695663                        | ns |
|           |             |             | I                       | 0.39        | 1.67E-08 | **       | 1.2E-09              | **       | 0.902967               | ns          | 1.49332E-08                        | ** |
|           |             |             | L                       | 0.33        | 7.14E-10 | **       | 3.39E-09             | **       | 0.593863               | ns          | 4.30194E-10                        | ** |
|           | % VWC       | myo_ino     | H                       | 0.29        | 3.21E-06 | **       | 2.51E-15             | **       | 1.6E-05                | **          | 0.205069504                        | ns |
|           |             |             | I                       | 0.19        | 0.000265 | **       | 5.5E-12              | **       | 0.583292               | ns          | 0.000262993                        | ** |
|           |             |             | L                       | 0.23        | 4.56E-07 | **       | 2.74E-13             | **       | 0.156212               | ns          | 8.49195E-08                        | ** |
|           | % VWC       | Acon        | H                       | 0.06        | 0.047557 | *        | 4.92E-07             | **       | 0.019272               | *           | 0.956049211                        | ns |
|           |             |             | I                       | -0.03       | 0.896684 | ns       | 0.008473             | **       | 0.665935               | ns          | 0.984488018                        | ns |
|           |             |             | L                       | 0.06        | 0.012902 | *        | 0.172911             | ns       | 0.005409               | **          | 0.926705213                        | ns |
| % VWC     | Tre         | H           | 0.02                    | 0.169578    | ns       | 8.03E-08 | **                   | 0.076006 | ns                     | 0.23591081  | ns                                 |    |
|           |             | I           | 0.02                    | 0.221332    | ns       | 0.003407 | **                   | 0.101841 | ns                     | 0.99232508  | ns                                 |    |
|           |             | L           | 0.04                    | 0.03847     | *        | 1.3E-08  | **                   | 0.083946 | ns                     | 0.017304063 | *                                  |    |
| Cluster 2 | % VWC       | Ala         | H                       | 0.44        | 7.5E-10  | **       | 0.495443             | ns       | 1.86E-09               | **          | 0.507436696                        | ns |
|           |             |             | I                       | 0.55        | 4.09E-13 | **       | 0.06441              | ns       | 3.4E-12                | **          | 0.248021391                        | ns |
|           |             |             | L                       | 0.51        | 4.11E-17 | **       | 0.032211             | *        | 3.35E-16               | **          | 0.720581818                        | ns |
|           | % VWC       | Asp         | H                       | 0.58        | 3.29E-14 | **       | 1.95E-07             | **       | 1.71E-10               | **          | 0.000319085                        | ** |

|           |           |       |      |       |          |          |          |          |          |          |             |             |    |
|-----------|-----------|-------|------|-------|----------|----------|----------|----------|----------|----------|-------------|-------------|----|
| Cluster 3 |           |       | I    | 0.75  | 5.28E-22 | **       | 2.2E-13  | **       | 3.13E-15 | **       | 4.4111E-09  | **          |    |
|           |           |       | L    | 0.64  | 1.35E-23 | **       | 9.97E-13 | **       | 3.76E-18 | **       | 8.86342E-05 | **          |    |
|           | % VWC     | Succ  | H    | 0.13  | 0.002552 | **       | 0.002731 | **       | 0.001216 | **       | 0.934578064 | ns          |    |
|           |           |       | I    | 0.10  | 0.011786 | *        | 2.29E-06 | **       | 0.079587 | ns       | 0.004180568 | **          |    |
|           |           |       | L    | 0.25  | 1.41E-07 | **       | 0.117438 | ns       | 2.2E-08  | **       | 0.013816656 | *           |    |
|           | % VWC     | Glyc  | H    | 0.17  | 0.000719 | **       | 0.032305 | *        | 0.000231 | **       | 0.028110616 | *           |    |
|           |           |       | I    | 0.01  | 0.251053 | ns       | 7.77E-06 | **       | 0.526012 | ns       | 0.097988731 | ns          |    |
|           |           |       | L    | 0.12  | 0.000429 | **       | 0.004182 | **       | 0.000111 | **       | 0.033384457 | *           |    |
|           | % VWC     | Suc   | H    | -0.01 | 0.616676 | ns       | 3.59E-23 | **       | 0.926646 | ns       | 0.373898191 | ns          |    |
|           |           |       | I    | 0.01  | 0.311873 | ns       | 1.37E-23 | **       | 0.376776 | ns       | 0.143009782 | ns          |    |
|           |           |       | L    | 0.05  | 0.029774 | *        | 3.05E-33 | **       | 0.216916 | ns       | 0.008553823 | **          |    |
|           | % VWC     | Quin  | H    | 0.17  | 0.000604 | **       | 0.159313 | ns       | 0.015485 | *        | 0.03072927  | *           |    |
|           |           |       | I    | 0.26  | 1.4E-05  | **       | 0.022188 | *        | 0.001341 | **       | 0.012685533 | *           |    |
|           |           |       | L    | 0.00  | 0.334438 | ns       | 0.20731  | ns       | 0.143479 | ns       | 0.47284016  | ns          |    |
|           | % VWC     | Shik  | H    | -0.01 | 0.447283 | ns       | 4.75E-05 | **       | 0.769145 | ns       | 0.208867967 | ns          |    |
|           |           |       | I    | 0.04  | 0.086346 | ns       | 2.83E-06 | **       | 0.368869 | ns       | 0.105009159 | ns          |    |
|           |           |       | L    | 0.02  | 0.103725 | ns       | 2.8E-07  | **       | 0.635934 | ns       | 0.076974001 | ns          |    |
|           | Cluster 3 | % VWC | Oxal | H     | 0.02     | 0.189189 | ns       | 6.33E-05 | **       | 0.156076 | ns          | 0.53871716  | ns |
|           |           |       |      | I     | 0.10     | 0.009727 | **       | 0.000994 | **       | 0.954124 | ns          | 0.003901113 | ** |
|           |           |       |      | L     | -0.01    | 0.783397 | ns       | 0.002269 | **       | 0.984921 | ns          | 0.511396522 | ns |
|           |           | % VWC | Ser  | H     | 0.21     | 0.000106 | **       | 1.78E-13 | **       | 0.02599  | *           | 0.003933901 | ** |
|           |           |       |      | I     | 0.44     | 7.76E-10 | **       | 1.9E-21  | **       | 4.53E-09 | **          | 0.263230398 | ns |
|           |           |       |      | L     | 0.16     | 3.85E-05 | **       | 9.65E-17 | **       | 0.001983 | **          | 0.034760545 | *  |
|           | % VWC     | Gln   | H    | 0.19  | 0.000226 | **       | 3.19E-11 | **       | 0.292582 | ns       | 0.00053809  | **          |    |

|       |     |      |          |           |          |          |          |          |          |          |             |             |             |
|-------|-----|------|----------|-----------|----------|----------|----------|----------|----------|----------|-------------|-------------|-------------|
|       |     |      | I        | 0.06      | 0.046984 | *        | 2.95E-10 | **       | 0.03648  | *        | 0.572363212 | ns          |             |
|       |     |      | L        | 0.13      | 0.000292 | **       | 7.19E-16 | **       | 0.005985 | **       | 0.060160695 | ns          |             |
|       |     |      | % VWC    | Mal       | H        | -0.01    | 0.460714 | ns       | 5.84E-05 | **       | 0.570085    | ns          | 0.218797347 |
|       |     |      |          | I         | 0.33     | 4.51E-07 | **       | 5.4E-16  | **       | 7.2E-08  | **          | 0.035840911 | *           |
|       |     |      |          | L         | 0.27     | 2.94E-08 | **       | 2.51E-19 | **       | 6.61E-09 | **          | 0.001243058 | **          |
|       |     |      |          | % VWC     | Cit      | H        | 0.29     | 3.16E-06 | **       | 0.13907  | ns          | 1.83E-05    | **          |
|       |     |      |          | I         | -0.01    | 0.552456 | ns       | 0.019907 | *        | 0.28353  | ns          | 0.60387314  | ns          |
|       |     |      |          | L         | 0.00     | 0.434252 | ns       | 8.13E-05 | **       | 0.535196 | ns          | 0.404847082 | ns          |
|       |     |      |          | % VWC     | Mala     | H        | 0.05     | 0.072476 | ns       | 0.476919 | ns          | 0.022742    | *           |
|       |     |      |          | I         | 0.00     | 0.39965  | ns       | 0.041675 | *        | 0.217512 | ns          | 0.913673094 | ns          |
|       |     |      |          | L         | -0.01    | 0.591566 | ns       | 1.88E-05 | **       | 0.377768 | ns          | 0.869093575 | ns          |
|       |     |      |          | Cluster 4 |          |          | H        | 0.66     | 3.21E-17 | **       | 1.6E-25     | **          | 5.14E-18    |
|       | I   | 0.76 | 1.35E-22 |           |          |          | **       | 4.1E-28  | **       | 2.22E-23 | **          | 3.3385E-09  | **          |
|       | L   | 0.66 | 5.11E-25 |           |          |          | **       | 1.2E-35  | **       | 5.67E-26 | **          | 4.24188E-05 | **          |
|       |     |      |          |           | H        | 0.58     | 2.68E-14 | **       | 2.22E-19 | **       | 4.65E-15    | **          | 2.11418E-05 |
| I     |     |      |          |           | 0.76     | 8.53E-23 | **       | 1.58E-28 | **       | 1.27E-23 | **          | 6.6528E-09  | **          |
| L     |     |      |          |           | 0.76     | 3.94E-33 | **       | 6.35E-42 | **       | 3.78E-34 | **          | 4.86579E-11 | **          |
|       |     |      | H        |           | 0.49     | 3.28E-11 | **       | 3.94E-20 | **       | 4.47E-12 | **          | 0.002905115 | **          |
|       |     |      | I        |           | 0.47     | 1.33E-10 | **       | 1.96E-19 | **       | 2.04E-11 | **          | 0.04545614  | *           |
|       |     |      | L        |           | 0.51     | 5.23E-17 | **       | 2E-33    | **       | 6.45E-18 | **          | 0.002434947 | **          |
|       |     |      | H        |           | 0.52     | 4.6E-12  | **       | 5.17E-14 | **       | 1.67E-12 | **          | 8.32829E-06 | **          |
|       |     |      | I        |           | 0.51     | 6.88E-12 | **       | 8.57E-14 | **       | 3.07E-12 | **          | 5.3091E-06  | **          |
|       |     |      | L        |           | 0.62     | 2.68E-22 | **       | 8.97E-29 | **       | 2.9E-23  | **          | 6.61417E-07 | **          |
| % VWC | Ile | H    | 0.75     |           | 9.88E-22 | **       | 5.78E-29 | **       | 1.1E-22  | **       | 2.12464E-06 | **          |             |

|       |      |   |      |          |    |          |    |          |    |             |    |
|-------|------|---|------|----------|----|----------|----|----------|----|-------------|----|
|       |      | I | 0.69 | 9.96E-19 | ** | 9.76E-25 | ** | 1.2E-19  | ** | 7.95756E-06 | ** |
|       |      | L | 0.59 | 7.88E-21 | ** | 1.05E-28 | ** | 9.03E-22 | ** | 1.28145E-06 | ** |
| % VWC | Leu  | H | 0.67 | 1.49E-17 | ** | 1.48E-24 | ** | 1.79E-18 | ** | 3.53604E-05 | ** |
|       |      | I | 0.70 | 4.43E-19 | ** | 4.3E-24  | ** | 8.73E-20 | ** | 6.05624E-08 | ** |
|       |      | L | 0.60 | 2.5E-21  | ** | 1.02E-29 | ** | 2.59E-22 | ** | 3.79591E-06 | ** |
| % VWC | Gly  | H | 0.33 | 4.49E-07 | ** | 7.97E-14 | ** | 7.71E-08 | ** | 0.123341665 | ns |
|       |      | I | 0.36 | 8.67E-08 | ** | 9.89E-16 | ** | 1.56E-08 | ** | 0.145404235 | ns |
|       |      | L | 0.55 | 6.24E-19 | ** | 5.67E-35 | ** | 9.02E-20 | ** | 0.00373693  | ** |
| % VWC | Phe  | H | 0.47 | 1.08E-10 | ** | 1.1E-16  | ** | 1.72E-11 | ** | 0.056278786 | ns |
|       |      | I | 0.37 | 4.53E-08 | ** | 4.9E-11  | ** | 8.04E-09 | ** | 0.005345737 | ** |
|       |      | L | 0.49 | 4.05E-16 | ** | 3.79E-22 | ** | 4.6E-17  | ** | 0.000133516 | ** |
| % VWC | Thr  | H | 0.26 | 1.44E-05 | ** | 6.04E-12 | ** | 9.09E-06 | ** | 0.905256471 | ns |
|       |      | I | 0.31 | 9.97E-07 | ** | 3.84E-13 | ** | 1.64E-07 | ** | 0.086081168 | ns |
|       |      | L | 0.11 | 0.001294 | ** | 1.82E-11 | ** | 0.000716 | ** | 0.945510317 | ns |
| % VWC | Gltl | H | 0.31 | 1.22E-06 | ** | 3.36E-12 | ** | 2.18E-07 | ** | 0.15142417  | ns |
|       |      | I | 0.37 | 3.4E-08  | ** | 2.9E-13  | ** | 6.53E-09 | ** | 0.0032021   | ** |
|       |      | L | 0.17 | 3.04E-05 | ** | 1.32E-14 | ** | 5.25E-05 | ** | 0.543741527 | ns |
| % VWC | Mann | H | 0.34 | 2.28E-07 | ** | 1.43E-14 | ** | 4.55E-08 | ** | 0.005578526 | ** |
|       |      | I | 0.44 | 7.64E-10 | ** | 4.71E-20 | ** | 1.82E-10 | ** | 0.236516341 | ns |
|       |      | L | 0.52 | 3.03E-17 | ** | 1.19E-28 | ** | 3.29E-18 | ** | 0.000117546 | ** |

**Table S9.** Summary of the % yield,  $g_s$ , and A reduction at each irrigation level compared to IRR1\_1 in 2016.

|  | Yield | $g_s$ | A |
|--|-------|-------|---|
|--|-------|-------|---|

|      | IRRI 1 (g) | % change IRRI 1 - IRRI 2 | % change IRRI 1 - IRRI 3 | % change IRRI 1 - IRRI 4 | IRRI 1 | % change IRRI 1 - IRRI 2 | % change IRRI 1 - IRRI 3 | % change IRRI 1 - IRRI 4 | IRRI 1 | % change IRRI 1 - IRRI 2 | % change IRRI 1 - IRRI 3 | % change IRRI 1 - IRRI 4 |
|------|------------|--------------------------|--------------------------|--------------------------|--------|--------------------------|--------------------------|--------------------------|--------|--------------------------|--------------------------|--------------------------|
| PI77 | 47.0       | -23                      | -44                      | -56                      | 0.86   | -51                      | -63                      | -83                      | 14.2   | -1                       | -10                      | -40                      |
| TQNG | 47.0       | 19                       | -22                      | -39                      | 0.63   | -6                       | -59                      | -90                      | 16.6   | 0                        | -28                      | -60                      |
| FRCS | 37.7       | -8                       | 22                       | -22                      | 0.38   | 3                        | -42                      | -71                      | 15.5   | -9                       | -17                      | -60                      |
| LGRU | 26.5       | -29                      | -49                      | -65                      | 0.44   | -25                      | -55                      | -95                      | 15.2   | -5                       | -13                      | -71                      |
| SABR | 24.5       | -1                       | -5                       | -14                      | 0.29   | 14                       | -10                      | -59                      | 13.4   | 5                        | -2                       | -60                      |
| LMNT | 17.3       | 11                       | -3                       | -77                      | 0.38   | -29                      | -61                      | -74                      | 15.2   | -14                      | -43                      | -49                      |
| KBNT | 14.2       | 14                       | 36                       | 6                        | 0.23   | 4                        | -13                      | -78                      | 11.3   | 1                        | -8                       | -57                      |

Table S10. Means and SE of heading dates of 7 rice cultivars under 4 different irrigation levels (IRRI\_1 to 4).

| Year | Cultivars | IRRI. Treat | Days to Heading |      |
|------|-----------|-------------|-----------------|------|
|      |           |             | Mean            | SE   |
| 2016 | FRCS      | 1           | 95              | 0.30 |
|      |           | 2           | 94.6            | 0.63 |
|      |           | 3           | 95.6            | 1.72 |
|      |           | 4           | 97.7            | 1.45 |
|      | KBNT      | 1           | 104.5           | 1.76 |
|      |           | 2           | 102.55          | 0.40 |
|      |           | 3           | 100.3           | 0.72 |
|      |           | 4           | 105.3           | 0.69 |
|      | LGRU      | 1           | 107.1           | 1.10 |
|      |           | 2           | 105             | 0.55 |
|      |           | 3           | 108.7           | 2.22 |
|      |           | 4           | 108.6           | 2.23 |
|      | LMNT      | 1           | 100.8           | 1.08 |
|      |           | 2           | 103.6           | 0.17 |
|      |           | 3           | 103.3           | 0.92 |
|      |           | 4           | 108             | 0.40 |
| PI77 | 1         | 95          | 0.61            |      |
|      | 2         | 104.5       | 1.73            |      |
|      | 3         | 106.6       | 1.23            |      |

|  |      |   |       |      |
|--|------|---|-------|------|
|  |      | 4 | 107.3 | 0.88 |
|  | SABR | 1 | 96.8  | 1.01 |
|  |      | 2 | 105   | 2.12 |
|  |      | 3 | 103.8 | 0.72 |
|  |      | 4 | 102   | 0.81 |
|  | TQNG | 1 | 103.8 | 0.72 |
|  |      | 2 | 102.8 | 1.33 |
|  |      | 3 | 107   | 1.33 |
|  |      | 4 | 109   | 0    |
